# Supplementary material
Source: publisher figshare collection journal article supplement (https://gsajournals.figshare.com/ndownloader/files/14510486)
Supplement: Supplementary file 1 [file 14510486]

## Sheet: Sheet1
		% paralysis			% paralysis				ratio
		control	±S.E.M.	number of animals tested	+As	±S.E.M.	number of animals tested	time	As/control
wt	N2	90	5.62	49	44	3.16	49	120	0.488889		wild type Bristol N2
aak-2	gt33	89	2.52	48	9	6.15	52	70	0.101124		catalytic alpha subunit of AMP-activated protein kinases (AMPKs)
aex-4	sa22	70	0.71	41	11	11.6	43	105	0.157143		ortholog of human SNAP23 (synaptosome associated protein 23) and Snap25 (synaptosome associated protein 25)
aex-5	sa23	91	1.74	60	54	4.69	64	225	0.593407		ortholog of calcium-dependent serine endoproteinases
asna-1	ok938	91	6.03	63	60	2.91	35	105	0.659341		membrane transporter
bbs-1	ok1111	86	10	50	47	2.8	36	75	0.546512		ortholog of human BBS1
cab-1	tg46	61	2.83	49	28	10.7	49	90	0.459016		homologous to mouse NPDC-1
calm-1	tm1353	91	5.76	47	41	4.17	46	90	0.450549		ortholog of human Cib2 (calcium and integrin binding family member 2) and CIB3 (calcium and integrin binding family member 3)
cat-2	e1112	59	8.1	76	17	1.02	84	135	0.288136		tyrosine hydroxylase
cle-1	cg120	60	12.2	40	20	4.08	40	75	0.333333		homolog of XV/XVIII collagen
dab-1	gk291	66	6.31	45	39	2.65	25	80	0.590909		cytoplasmic adaptor protein DISABLED
daf-2	e1370	92	0.29	52	81	5.01	49	80	0.880435		insulin/IGF receptor
daf-12	rh61rh411	69	3.89	75	45	3.42	74	105	0.652174		steroid hormone receptor
daf-16	mu86	94	5.33	70	51	1.11	77	150	0.542553		homology of forkhead box O (FOXO)
daf-36	k114	89	2.12	77	32	2.74	73	105	0.359551		homologous to the catalytic subunit of Rieske-like oxygenases
daf-7	e1372	89	2.35	47	43	4.36	39	120	0.483146		transforming growth factor beta
daf-9	rh50	92	3.26	50	71	1.97	53	150	0.771739		cytochrome P450 of the CYP2 subfamily
dfk-2	ok1704	87	4.09	39	10	7.23	41	75	0.114943		novel protein kinase
dig-1	n1321	58	4.29	38	21	0	39	75	0.362069		immunoglobulin
drp-1	tm1108	84	3.11	74	11	0.25	78	75	0.130952		dynamin-related protein, orthologous to Dnm1p in S. cerevisiae and DRP1 in mammals
eat-4	ky5	80	0	50	28	10.4	40	105	0.35		ortholog of the mammalian BNPI vesicular glutamate transporter
egl-15	n1477	88	8.07	51	92	3.84	52	125	1.04545		fibroblast growth factor receptor
egl-17	ay6	73	5.81	75	31	7.66	82	80	0.424658		fibroblast growth factor (FGF)-like protein
egl-30	ad806	68	0	75	5	3.84	70	280	0.0735294		ortholog of the heterotrimeric G protein alpha subunit Gq (Gq/G11 class)
egl-8	sa47	33	8.3	48	16	4.16	48	140	0.484848		phospholipase C beta
emb-9	b117	85	1.3	42	22	6.25	48	75	0.258824		phospholipase C beta
flp-21	ok889	77	3.38	56	34	10.2	37	130	0.441558		FMRFamide-related neuropeptide (FaRP)
gar-1	ok755	91	0.7	48	42	10.1	46	110	0.461538		G protein-linked muscarinic acetylcholine receptor
gar-3	gk305	95	3.45	48	10	1.55	47	90	0.105263		G protein-linked muscarinic acetylcholine receptor
gln-1	gk329791	58	8.3	43	22	3.78	35	70	0.37931		ortholog of human GLUL (glutamate-ammonia ligase)
gln-2	gk737178	83	4.16	48	19	5.35	45	120	0.228916		ortholog of human GLUL (glutamate-ammonia ligase)
glna-1	tm6496	72	5.03	63	42	5.72	63	130	0.583333		ortholog of human GLS2 (glutaminase 2) and GLS (glutaminase)
glna-2	gk536170	90	2.06	53	34	2	50	120	0.377778		ortholog of human GLS2 (glutaminase 2) and GLS (glutaminase)
glr-1	n2461	84	8	50	34	2.51	41	85	0.404762		AMPA-type ionotropic glutamate receptor
grl-6	ok2659	90	2	50	38	9.41	49	130	0.422222		AMPA (non-NMDA)-type ionotropic glutamate receptor subunit
hmt-1	gk161	71	2.49	52	37	8.6	51	105	0.521127		ABC transporter
hyl-1	gk203	83	4.3	72	41	2.46	73	110	0.493976		ceramide synthase
hyl-2	ok1766	61	7.26	75	34	3.16	73	165	0.557377		ceramide synthase
ins-1	nj32	84	4	50	48	9.61	52	150	0.571429		insulin-like peptide
ins-11	tm1053	97	2.17	48	41	1.15	51	180	0.42268		insulin-like peptide
ins-18	ok1672	42	2	50	4	0.1	51	150	0.0952381		insulin-like peptide
ins-20	tm5634	67	4.33	73	5	1.49	76	170	0.0746269		insulin-like peptide
ins-22	ok3616	92	4	50	30	6.75	49	185	0.326087		insulin-like peptide
ins-3	ok2488	38	1.25	49	12	0.25	49	185	0.315789		insulin-like peptide
ins-30	ok2343	92	4	50	14	2	50	125	0.152174		insulin-like peptide
ins-31	ok3543	73	1.5	49	44	0	50	180	0.60274		insulin-like peptide
ins-4	ok3534	35	9.49	75	6	3.85	76	170	0.171429		insulin-like peptide
inx-16	tm1589	52	2.41	75	25	6.89	77	300	0.480769		pannexin
lbp-1	ok3426	62	10.2	40	15	4.08	40	75	0.241935		fatty acid binding protein (FABP)
let-756	s2613	81	2.56	74	25	0.82	77	90	0.308642		fibroblast growth factor (FGF)-like ligand
mgl-1;mgl-2	tm1811;tm355	94	1.27	72	66	10.37	79	120	0.702128		metabotropic glutamate receptor
mig-6	ev701	82	10.39	42	39	2.9	47	105	0.47561		extracellular matrix proteins papilin and lacunin
mir-84	n4037	82	4.46	73	51	3.97	74	120	0.621951		microRNA
nas-21	ok3342	72	2.21	47	28	9.79	50	120	0.388889		astacin-like metalloprotease
nas-37	ox199	50	6.52	46	23	2.63	38	380	0.46		Astacin-class metalloprotease
nca-1;nca-2	gk9;gk5	82	6	50	20	0.8	50	140	0.243902		alpha-1-like subunits of a voltage-insensitive cation leak channel
nhr-48	ok178	74	10.59	52	25	4.3	70	90	0.337838		nuclear receptor
nhr-8	ok186	85	2.66	75	42	1.69	75	120	0.494118		nuclear hormone receptor
nlg-1	ok259	88	1.43	44	10	4.89	50	105	0.113636		neuroligin
nmr-1	ak4	71	8.1	51	20	7.75	49	130	0.28169		NMDA-type ionotropic glutamate receptor subunit
nmr-2	ok3324	97	2.08	49	6	1.32	48	115	0.0618557		ionotropic glutamate receptor (iGluR) subunit
nsy-1	ag3	84	2.3	75	84	4.24	73	135	1		MAP kinase kinase kinase
pbo-4	ok583	72	7.5	40	40	0	35	105	0.555556		Na+/H+ ion exchanger (NHE)
pept-1	lg1601	79	4.6	39	26	6.66	42	120	0.329114		oligopeptide transporter
pho-1	sa7	90	2.62	75	66	7.02	77	140	0.733333		calcium binding protein
pkc-1	nu444	67	6.12	49	18	1.06	48	120	0.268657		serine/threonine protein kinase
pmk-1	km25	82	3.38	40	100	0	40	120	1.21951		MAP kinase
pph-5	ok3498	77	0.49	45	9	9	42	75	0.116883		protein phosphatase
rab-10	ok1494	66	14	50	32	8	50	95	0.484848		Rab-like GTPase
rab-35	b1013	70	10.4	60	23	4.4	60	90	0.328571		monomeric Rab GTPase
sek-1	km4	41	3.52	75	55	4.19	74	90	1.34146		MAP kinase kinase
sem-5	n1779	65	7.73	48	25	5.38	51	215	0.384615		Src homology (SH) domain 2 and 3-containing protein
skn-1	zu67	88	2.3	75	93	2.1	74	100	1.05682		homologus to Nrf2 transcription factor
snt-1	md290	89	1.65	48	76	4	49	115	0.853933		orthologous to synaptotagmin
snt-2	tm1711	81	2.8	65	50	5.13	67	135	0.617284		orthologous to synaptotagmin
soc-1	n1789	87	2.21	73	50	6.37	76	120	0.574713		multisubstrate adaptor (MSA) protein
soc-2	n1774	87	0.25	49	38	2	50	80	0.436782		leucine-rich repeat protein
sos-1	cs41	57	7.6	47	6	1.99	47	145	0.105263		guanine nucleotide exchange factor
sphk-1	ok1097	36	3.35	68	66	7.7	68	130	1.83333		sphingoshine kinase
sptl-1	ok1693	72	6.75	65	41	5.89	76	90	0.569444		serine palmitoyltransferase
tag-117	gk218	55	3.35	43	4	0.11	41	310	0.0727273		ortholog of human MPP7
tag-38	ok490	85	1.33	75	50	3.66	73	90	0.588235		sphingosine-1-phosphate lyase 1
tap-1	gk202	70	6	50	30	1.41	49	95	0.428571		ortholog of the vertebrate TAB1 (TGF-beta activated kinase 1/MAP3K7 binding protein 1) protein
tdc-1	n3419	94	1.8	75	11	2.61	77	120	0.117021		tyrosine decarboxylase
tph-1	mg280	66	0.64	50	32	8.8	49	135	0.484848		tryptophan hydroxylase
unc-73	e936	91	0	48	40	5.79	51	90	0.43956		guanine nucleotide exchange factor
unc-10	e102	58	9.6	72	54	5.64	79	350	0.931034		homologous to vertebrate Rim1
unc-11	e47	65	1.33	50	24	1.46	50	160	0.369231		clathrin-adaptor protein
unc-17	e245	72	11.33	72	38	5.33	76	240	0.527778		synaptic vesicle acetylcholine transporter (VAChT)
unc-25	e156	93	1.46	60	61	5.77	60	60	0.655914		glutamic acid decarboxylase
unc-30	e191	78	1.36	50	47	8.5	50	60	0.602564		homeodomain-containing protein
unc-31	e928	94	1.63	50	86	1.63	51	105	0.914894		pleckstrin homology (PH) domain-containing protein
unc-32	f121	10	2.15	51	27	3.38	51	215	2.7		ortholog of subunit a of the membrane-bound (V0) domain of vacuolar proton-translocating ATPase (V-ATPase)
unc-43	n498n1186	93	1.19	49	52	2.08	48	60	0.55914		ortholog of type II calcium/calmodulin-dependent protein kinase (CaMKII)
unc-43	n498	65	5.41	49	40	12	50	200	0.615385		ortholog of type II calcium/calmodulin-dependent protein kinase (CaMKII)
unc-53	e2432	88	1.75	60	58	6.66	60	90	0.659091		orthologous to human NAV1, NAV2/RAINB1
unc-64	e246	20	5	40	0	0	26	265	0		syntaxin
vnut-1	gk851043	81	3.17	49	36	0.75	49	130	0.444444		ortholog of human SLC17A9
xrep-4	zj26	95	4.16	49	26	4.02	48	120	0.273684		F-box-encoding gene

## Sheet: Sheet2
Screening for mutants that blocked or attenuated aldicarb resistance caused by arsenite treatment.
		% paralysis			% paralysis				ratio		Published data Kim and Sieburth 2018b
	allele	control	±S.E.M.	number of animals tested	+As	±S.E.M.	number of animals tested	time	As/control		In this paper
wt	N2	90	5.62	49	44	3.16	49	120	0.488889		wild type Bristol N2
kinase
aak-2	gt33	89	2.52	48	9	6.15	52	70	0.101124		catalytic alpha subunit of AMP-activated protein kinases (AMPKs)
dfk-2	ok1704	87	4.09	39	10	7.23	41	75	0.114943		novel protein kinase
nsy-1	ag3	84	2.3	75	84	4.24	73	135	1		MAP kinase kinase kinase
pkc-1	nu444	67	6.12	49	18	1.06	48	120	0.268657		serine/threonine protein kinase
pmk-1	km25	82	3.38	40	100	0	40	120	1.21951		MAP kinase
sek-1	km4	41	3.52	75	55	4.19	74	90	1.34146		MAP kinase kinase
sphk-1	ok1097	36	3.35	68	66	7.7	68	130	1.83333		sphingoshine kinase
metabolism
hyl-1	gk203	83	4.3	72	41	2.46	73	110	0.493976		ceramide synthase
hyl-2	ok1766	61	7.26	75	34	3.16	73	165	0.557377		ceramide synthase
sptl-1	ok1693	72	6.75	65	41	5.89	76	90	0.569444		serine palmitoyltransferase
tag-38	ok490	85	1.33	75	50	3.66	73	90	0.588235		sphingosine-1-phosphate lyase 1
neuron function
aex-4	sa22	70	0.71	41	11	11.6	43	105	0.157143		ortholog of human SNAP23 (synaptosome associated protein 23) and Snap25 (synaptosome associated protein 25)
cab-1	tg46	61	2.83	49	28	10.7	49	90	0.459016		homologous to mouse NPDC-1
cat-2	e1112	59	8.1	76	17	1.02	84	135	0.288136		tyrosine hydroxylase
gar-1	ok755	91	0.7	48	42	10.1	46	110	0.461538		G protein-linked muscarinic acetylcholine receptor
gar-3	gk305	95	3.45	48	10	1.55	47	90	0.105263		G protein-linked muscarinic acetylcholine receptor
nca-1;nca-2	gk9;gk5	82	6	50	20	0.8	50	140	0.243902		alpha-1-like subunits of a voltage-insensitive cation leak channel
nlg-1	ok259	88	1.43	44	10	4.89	50	105	0.113636		neuroligin
rab-10	ok1494	66	14	50	32	8	50	95	0.484848		Rab-like GTPase
rab-35	b1013	70	10.4	60	23	4.4	60	90	0.328571		monomeric Rab GTPase
snt-1	md290	89	1.65	48	66	2.82	49	115	0.741573		orthologous to synaptotagmin
snt-2	tm1711	81	2.8	65	50	5.13	67	135	0.617284		orthologous to synaptotagmin
tdc-1	n3419	94	1.8	75	11	2.61	77	120	0.117021		tyrosine decarboxylase
tph-1	mg280	66	0.64	50	32	8.8	49	135	0.484848		tryptophan hydroxylase
unc-73	e936	91	0	48	40	5.79	51	90	0.43956		guanine nucleotide exchange factor
unc-10	e102	58	9.6	72	45	5.64	79	350	0.775862		homologous to vertebrate Rim1
unc-11	e47	65	1.33	50	24	1.46	50	160	0.369231		clathrin-adaptor protein
unc-17	e245	72	11.33	72	38	5.33	76	240	0.527778		synaptic vesicle acetylcholine transporter (VAChT)
unc-25	e156	93	1.46	60	61	5.77	60	60	0.655914		glutamic acid decarboxylase
unc-30	e191	78	1.36	50	47	8.5	50	60	0.602564		homeodomain-containing protein
unc-43	n498n1186	93	1.19	49	52	2.08	48	60	0.55914		ortholog of type II calcium/calmodulin-dependent protein kinase (CaMKII)
unc-43	n498	65	5.41	49	40	12	50	200	0.615385		ortholog of type II calcium/calmodulin-dependent protein kinase (CaMKII)
unc-53	e2432	88	1.75	60	58	6.66	60	90	0.659091		orthologous to human NAV1, NAV2/RAINB1
unc-64	e246	20	5	40	0	0	26	265	0		syntaxin
neuropeptide
flp-21	ok889	77	3.38	56	34	10.2	37	130	0.441558		FMRFamide-related neuropeptide (FaRP)
ins-1	nj32	84	4	50	48	9.61	52	150	0.571429		insulin-like peptide
ins-11	tm1053	97	2.17	48	41	1.15	51	180	0.42268		insulin-like peptide
ins-18	ok1672	42	2	50	4	0.1	51	150	0.0952381		insulin-like peptide
ins-20	tm5634	67	4.33	73	5	1.49	76	170	0.0746269		insulin-like peptide
ins-22	ok3616	92	4	50	30	6.75	49	185	0.326087		insulin-like peptide
ins-3	ok2488	38	1.25	49	12	0.25	49	185	0.315789		insulin-like peptide
ins-30	ok2343	92	4	50	14	2	50	125	0.152174		insulin-like peptide
ins-31	ok3543	73	1.5	49	44	0	50	180	0.60274		insulin-like peptide
ins-4	ok3534	35	9.49	75	6	3.85	76	170	0.171429		insulin-like peptide
signaling
aex-5	sa23	91	1.74	60	54	4.69	64	225	0.593407		ortholog of calcium-dependent serine endoproteinases
calm-1	tm1353	91	5.76	47	41	4.17	46	90	0.450549		ortholog of human Cib2 (calcium and integrin binding family member 2) and CIB3 (calcium and integrin binding family member 3)
daf-2	e1370	92	0.29	52	81	5.01	49	80	0.880435		insulin/IGF receptor
daf-12	rh61rh411	69	3.89	75	45	3.42	74	105	0.652174		steroid hormone receptor
daf-16	mu86	94	5.33	70	51	1.11	77	150	0.542553		homology of forkhead box O (FOXO)
daf-7	e1372	89	2.35	47	43	4.36	39	120	0.483146		transforming growth factor beta
daf-9	rh50	92	3.26	50	71	1.97	53	150	0.771739		cytochrome P450 of the CYP2 subfamily
daf-36	k114	89	2.12	77	32	2.74	73	105	0.359551		homologous to the catalytic subunit of Rieske-like oxygenases
egl-15	n1477	88	8.07	51	92	3.84	52	125	1.04545		fibroblast growth factor receptor
egl-30	ad806	68	0	75	5	3.84	70	280	0.0735294		ortholog of the heterotrimeric G protein alpha subunit Gq (Gq/G11 class)
egl-8	sa47	33	8.3	48	16	4.16	48	140	0.484848		phospholipase C beta
gln-1	gk329791	58	8.3	43	22	3.78	35	70	0.37931		ortholog of human GLUL (glutamate-ammonia ligase)
gln-2	gk737178	83	4.16	48	19	5.35	45	120	0.228916		ortholog of human GLUL (glutamate-ammonia ligase)
glna-1	tm6496	72	5.03	63	42	5.72	63	130	0.583333		ortholog of human GLS2 (glutaminase 2) and GLS (glutaminase)
glna-2	gk536170	90	2.06	53	34	2	50	120	0.377778		ortholog of human GLS2 (glutaminase 2) and GLS (glutaminase)
glr-1	n2461	84	8	50	34	2.51	41	85	0.404762		AMPA-type ionotropic glutamate receptor
eat-4	ky5	80	0	50	28	10.4	40	105	0.35		ortholog of the mammalian BNPI vesicular glutamate transporter
grl-6	ok2659	90	2	50	38	9.41	49	130	0.422222		AMPA (non-NMDA)-type ionotropic glutamate receptor subunit
inx-16	tm1589	52	2.41	75	25	6.89	77	300	0.480769		pannexin
mgl-1;mgl-2	tm1811;tm355	94	1.27	72	66	10.37	79	120	0.702128		metabotropic glutamate receptor
nhr-48	ok178	74	10.59	52	25	4.3	70	90	0.337838		nuclear receptor
nmr-1	ak4	71	8.1	51	20	7.75	49	130	0.28169		NMDA-type ionotropic glutamate receptor subunit
nmr-2	ok3324	97	2.08	49	6	1.32	48	115	0.0618557		ionotropic glutamate receptor (iGluR) subunit
pbo-4	ok583	72	7.5	40	40	0	35	105	0.555556		Na+/H+ ion exchanger (NHE)
pho-1	sa7	90	2.62	75	66	7.02	77	140	0.733333		calcium binding protein
tap-1	gk202	70	6	50	30	1.41	49	95	0.428571		ortholog of the vertebrate TAB1 (TGF-beta activated kinase 1/MAP3K7 binding protein 1) protein
nhr-8	ok186	85	2.66	75	42	1.69	75	120	0.494118		nuclear hormone receptor
secreted protein
bbs-1	ok1111	86	10	50	47	2.8	36	75	0.546512		ortholog of human BBS1
cle-1	cg120	60	12.2	40	20	4.08	40	75	0.333333		homolog of XV/XVIII collagen
dig-1	n1321	58	4.29	38	21	0	39	75	0.362069		immunoglobulin
emb-9	b117	85	1.3	42	22	6.25	48	75	0.258824		alpha-1 chain of Type IV basement membrane collagen
lbp-1	ok3426	62	10.2	40	15	4.08	40	75	0.241935		fatty acid binding protein (FABP)
mig-6	ev701	82	10.39	42	39	2.9	47	105	0.47561		extracellular matrix proteins papilin and lacunin
dab-1	gk291	66	6.31	45	39	2.65	25	80	0.590909		cytoplasmic adaptor protein DISABLED
pph-5	ok3498	77	0.49	45	9	9	42	75	0.116883		protein phosphatase
transporter
asna-1	ok938	91	6.03	63	60	2.91	35	105	0.659341		membrane transporter
hmt-1	gk161	71	2.49	52	37	8.6	51	105	0.521127		ABC transporter
pept-1	lg1601	79	4.6	39	26	6.66	42	120	0.329114		oligopeptide transporter
stress response
skn-1	zu67	88	2.3	75	93	2.1	74	100	1.05682		homologus to Nrf2 transcription factor
xrep-4	zj26	95	4.16	49	26	4.02	48	120	0.273684		F-box-encoding gene
other
drp-1	tm1108	84	3.11	74	11	0.25	78	75	0.130952		dynamin-related protein, orthologous to Dnm1p in S. cerevisiae and DRP1 in mammals
mir-84	n4037	82	4.46	73	51	3.97	74	120	0.621951		microRNA
tag-117	gk218	55	3.35	43	4	0.11	41	310	0.0727273		ortholog of human MPP7
vnut-1	gk851043	81	3.17	49	36	0.75	49	130	0.444444		ortholog of human SLC17A9
nas-21	ok3342	72	2.21	47	28	9.79	50	120	0.388889		astacin-like metalloprotease
nas-37	ox199	50	6.52	46	23	2.63	38	380	0.46		astacin-class metalloprotease
